# Supplementary material
Source: publisher figshare collection journal article supplement (https://wiley.figshare.com/articles/dataset/_/3511481)
Supplement: Supplementary file 1 [file 1]

Appendix B. Summary of estimated population size, parameter estimates, risk of extinction and 90% decline in abundance and needed improvements in  $\lambda$  to reduce risk of decline or extinction in 50 years to below 5%, using all available data post-1965. When no hatchery fraction data were available estimates made using the total (wild + hatchery) spawner count data as described in the text. Estimates are provided for individual stocks only since ESU-level data generally were not available from 1965.

| ESU                                            | Stock                  | Pop.<br>Size<br>Est.<br>(TS <sub>0</sub> ) | Population Parameter Estimates |            |                         |                           |                           |          |  | Risk of Extinction   |                            |          | Risk of 90% Decline  |                            |          | Note <sup>3</sup> |
|------------------------------------------------|------------------------|--------------------------------------------|--------------------------------|------------|-------------------------|---------------------------|---------------------------|----------|--|----------------------|----------------------------|----------|----------------------|----------------------------|----------|-------------------|
|                                                |                        |                                            | $\mu$                          | $\sigma^2$ | $\lambda$<br>(95% c.i.) | Prob<br>$\lambda$<br><1.0 | Prob<br>$\lambda$<br><0.9 | Req<br>% |  | 50 yr.<br>(95% c.i.) | Prob.<br>VHER <sup>1</sup> | Req<br>% | 50 yr.<br>(95% c.i.) | Prob.<br>VHRD <sup>2</sup> | Req<br>% |                   |
| <b>Lower<br/>Columbia R<br/>chinook</b>        | Clatskanie R fall      | NA                                         | 0.01                           | 0.37       | 1.01 (0.77 - 1.31)      | 0.47                      | 0.21                      | 0        |  | NA                   | NA                         | NA       | 0.27 (0 - 0.99)      | 0.55                       | 10       |                   |
|                                                | Coweman R fall-tule    | 2923                                       | 0.08                           | 0.17       | 1.09 (0.90 - 1.32)      | 0.20                      | 0.05                      | 0        |  | 0 (0 - 0.07)         | 0.07                       | 0        | 0.02 (0 - 0.69)      | 0.24                       | 0        | t                 |
|                                                | Cowlitz R fall-tule    | NA                                         | -0.02                          | 0.14       | 0.98 (0.82 - 1.16)      | 0.59                      | 0.19                      | 2        |  | NA                   | NA                         | NA       | 0.34 (0 - 1)         | 0.61                       | 7        | a                 |
|                                                | Klickitat R fall-tule  | NA                                         | -0.06                          | 0.30       | 0.94 (0.73 - 1.22)      | 0.66                      | 0.36                      | 6        |  | NA                   | NA                         | NA       | 0.57 (0 - 1)         | 0.73                       | 16       | t                 |
|                                                | Lewis E Fk fall-tule   | 853                                        | -0.02                          | 0.05       | 0.98 (0.88 - 1.09)      | 0.63                      | 0.10                      | 2        |  | 0 (0 - 0.26)         | 0.12                       | 0        | 0.25 (0 - 0.97)      | 0.55                       | 4        |                   |
|                                                | Lewis R fall-bright    | 34652                                      | 0.01                           | 0.06       | 1.01 (0.90 - 1.12)      | 0.43                      | 0.06                      | 0        |  | 0 (0 - 0)            | 0.02                       | 0        | 0.06 (0 - 0.89)      | 0.37                       | 1        |                   |
|                                                | Plympton Cr fall       | NA                                         | 0.05                           | 0.09       | 1.05 (0.92 - 1.20)      | 0.22                      | 0.04                      | 0        |  | NA                   | NA                         | NA       | 0.01 (0 - 0.59)      | 0.22                       | 0        |                   |
|                                                | Skamokawa Cr fall-tule | NA                                         | -0.09                          | 0.17       | 0.91 (0.76 - 1.10)      | 0.80                      | 0.44                      | 9        |  | NA                   | NA                         | NA       | 0.78 (0.02 - 1)      | 0.83                       | 16       |                   |
|                                                | Washougal R fall-tule  | NA                                         | 0.10                           | 0.11       | 1.11 (0.95 - 1.28)      | 0.11                      | 0.02                      | 0        |  | NA                   | NA                         | NA       | 0 (0 - 0.22)         | 0.13                       | 0        |                   |
|                                                | White Salmon fall-tule | NA                                         | -0.07                          | 0.09       | 0.93 (0.81 - 1.06)      | 0.82                      | 0.33                      | 7        |  | NA                   | NA                         | NA       | 0.74 (0.01 - 1)      | 0.81                       | 11       |                   |
|                                                | Wind R fall-tule       | NA                                         | -0.05                          | 0.45       | 0.95 (0.70 - 1.29)      | 0.62                      | 0.35                      | 5        |  | NA                   | NA                         | NA       | 0.52 (0 - 1)         | 0.71                       | 18       |                   |
|                                                | Youngs R fall          | NA                                         | 0.04                           | 0.66       | 1.04 (0.73 - 1.48)      | 0.40                      | 0.20                      | 0        |  | NA                   | NA                         | NA       | 0.23 (0 - 0.98)      | 0.51                       | 12       |                   |
| <b>Upper<br/>Columbia R<br/>spring chinook</b> | Entiat R spr           | 168                                        | -0.10                          | 0.04       | 0.90 (0.83 - 0.99)      | 0.95                      | 0.46                      | 10       |  | 0.53 (0 - 1)         | 0.69                       | 5        | 0.97 (0.24 - 1)      | 0.94                       | 11       | t,d               |
|                                                | Methow R spr           | 486                                        | -0.13                          | 0.18       | 0.88 (0.73 - 1.06)      | 0.88                      | 0.60                      | 12       |  | 0.63 (0 - 1)         | 0.72                       | 12       | 0.92 (0.12 - 1)      | 0.90                       | 21       | t,a,d             |
|                                                | Wenatchee R spr        | 1466                                       | -0.11                          | 0.09       | 0.89 (0.78 - 1.02)      | 0.91                      | 0.54                      | 11       |  | 0.26 (0 - 0.97)      | 0.52                       | 4        | 0.94 (0.15 - 1)      | 0.92                       | 15       |                   |
| <b>Snake R<br/>spr/sum<br/>chinook</b>         | Alturas Lake Cr spr    | NA                                         | -0.20                          | 0.22       | 0.82 (0.67 - 1.00)      | 0.95                      | 0.81                      | 18       |  | NA                   | NA                         | NA       | 0.99 (0.45 - 1)      | 0.96                       | 31       |                   |
|                                                | Beaver Cr spr          | NA                                         | -0.18                          | 0.19       | 0.84 (0.68 - 1.02)      | 0.93                      | 0.75                      | 16       |  | NA                   | NA                         | NA       | 0.98 (0.37 - 1)      | 0.95                       | 27       |                   |

|                       |     |       |      |                    |      |      |    |                 |      |     |                 |      |    |     |
|-----------------------|-----|-------|------|--------------------|------|------|----|-----------------|------|-----|-----------------|------|----|-----|
| Big Cr spr            | NA  | -0.06 | 0.12 | 0.94 (0.81 - 1.10) | 0.74 | 0.29 | 6  | NA              | NA   | NA  | 0.61 (0 - 1)    | 0.75 | 10 |     |
| Big Sheep Cr spr      | NA  | -0.10 | 0.90 | 0.90 (0.60 - 1.35) | 0.70 | 0.48 | 10 | NA              | NA   | NA  | 0.66 (0.01 - 1) | 0.80 | 32 |     |
| Camas Cr spr          | NA  | -0.12 | 0.09 | 0.88 (0.77 - 1.01) | 0.92 | 0.60 | 12 | NA              | NA   | NA  | 0.97 (0.22 - 1) | 0.93 | 16 |     |
| Cape Horn Cr spr      | NA  | -0.08 | 0.20 | 0.92 (0.75 - 1.13) | 0.75 | 0.41 | 8  | NA              | NA   | NA  | 0.7 (0.01 - 1)  | 0.79 | 15 | d   |
| Catherine Cr spr      | NA  | -0.05 | 0.11 | 0.96 (0.83 - 1.10) | 0.70 | 0.22 | 4  | NA              | NA   | NA  | 0.49 (0 - 1)    | 0.70 | 9  |     |
| Catherine Cr N Fk spr | NA  | -0.06 | 0.26 | 0.94 (0.74 - 1.19) | 0.69 | 0.37 | 6  | NA              | NA   | NA  | 0.60 (0 - 1)    | 0.75 | 15 | a   |
| Catherine Cr S Fk spr | NA  | -0.09 | 0.56 | 0.91 (0.65 - 1.29) | 0.70 | 0.46 | 9  | NA              | NA   | NA  | 0.66 (0.01 - 1) | 0.78 | 25 | a   |
| Grande Ronde R spr    | NA  | -0.10 | 0.11 | 0.91(0.79 - 1.04)  | 0.88 | 0.47 | 9  | NA              | NA   | NA  | 0.87(0.05 - 1)  | 0.89 | 14 |     |
| Hayden Cr sum         | NA  | -0.05 | 0.25 | 0.95 (0.62 - 1.46) | 0.59 | 0.37 | 5  | NA              | NA   | NA  | 0.51 (0 - 1)    | 0.62 | 13 |     |
| Herd Cr sum           | NA  | -0.16 | 0.04 | 0.85 (0.74 - 0.99) | 0.92 | 0.73 | 15 | NA              | NA   | NA  | 1 (0.47 - 1)    | 0.93 | 18 | a,l |
| Imnaha R spr          | 610 | -0.06 | 0.06 | 0.94 (0.85 - 1.05) | 0.82 | 0.21 | 6  | 0.03 (0 - 0.80) | 0.26 | 0   | 0.65 (0.01 - 1) | 0.78 | 8  |     |
| Johnson Cr sum        | 432 | -0.03 | 0.06 | 0.97 (0.87 - 1.08) | 0.68 | 0.12 | 3  | 0.01 (0 - 0.57) | 0.18 | 0   | 0.34 (0 - 0.99) | 0.61 | 5  |     |
| Knapp Cr spr          | NA  | -0.18 | 0.12 | 0.84 (0.71 - 0.98) | 0.96 | 0.80 | 16 | NA              | NA   | NA  | 1 (0.53 - 1)    | 0.97 | 24 | d   |
| Lake Cr sum           | NA  | 0.00  | 0.22 | 1.00 (0.81 - 1.24) | 0.49 | 0.19 | 0  | NA              | NA   | NA  | 0.25 (0 - 0.98) | 0.54 | 7  | d   |
| Lemhi R spr           | NA  | -0.06 | 0.17 | 0.94 (0.78 - 1.12) | 0.73 | 0.33 | 6  | NA              | NA   | NA  | 0.62 (0.01 - 1) | 0.76 | 13 | a   |
| Lookingglass Cr spr   | NA  | -0.17 | 0.09 | 0.84 (0.74 - 0.96) | 0.97 | 0.82 | 16 | NA              | NA   | NA  | 1 (0.63 - 1)    | 0.98 | 22 |     |
| Loon Cr sum           | NA  | -0.06 | 0.03 | 0.94 (0.87 - 1.01) | 0.91 | 0.15 | 6  | NA              | NA   | NA  | 0.75 (0.03 - 1) | 0.83 | 6  | l   |
| Lostine R spr         | NA  | -0.04 | 0.06 | 0.96 (0.87 - 1.07) | 0.73 | 0.13 | 4  | NA              | NA   | NA  | 0.41(0 - 0.99)  | 0.66 | 5  |     |
| Marsh Cr spr          | 286 | -0.08 | 0.11 | 0.92 (0.80 - 1.07) | 0.82 | 0.36 | 8  | 0.30 (0 - 0.99) | 0.53 | 5   | 0.76 (0.02 - 1) | 0.83 | 12 |     |
| Minam R spr           | 322 | -0.05 | 0.18 | 0.95 (0.79 - 1.14) | 0.69 | 0.30 | 5  | 0.22 (0 - 0.96) | 0.46 | 4   | 0.55 (0.01 - 1) | 0.73 | 12 |     |
| Minam R Low spr       | NA  | -0.02 | 0.30 | 0.98 (0.78 - 1.25) | 0.54 | 0.24 | 2  | NA              | NA   | NA  | 0.35 (0 - 0.99) | 0.61 | 11 |     |
| Minam R Up spr        | NA  | -0.04 | 0.10 | 0.96 (0.83 - 1.10) | 0.70 | 0.21 | 4  | NA              | NA   | NA  | 0.48 (0 - 1)    | 0.69 | 8  |     |
| Poverty Cr            | 951 | -0.27 | 1.73 | 0.77 (0.43 - 1.36) | 0.87 | 0.74 | 23 | 0.88 (0.14 - 1) | 0.85 | 121 | 0.88 (0.06 - 1) | 0.93 | 70 |     |
| Salmon R E Fk spr     | NA  | -0.14 | 0.08 | 0.87 (0.68 - 1.10) | 0.82 | 0.60 | 13 | NA              | NA   | NA  | 0.99 (0.01 - 1) | 0.85 | 18 |     |

|                                    |                     |      |       |      |                    |      |      |    |                 |      |    |                 |      |    |     |
|------------------------------------|---------------------|------|-------|------|--------------------|------|------|----|-----------------|------|----|-----------------|------|----|-----|
|                                    | Salmon R E Fk sum   | NA   | -0.10 | 0.16 | 0.90 (0.76 - 1.08) | 0.84 | 0.48 | 10 | NA              | NA   | NA | 0.83(0.04 - 1)  | 0.87 | 16 | d   |
|                                    | Salmon R S Fk sum   | NA   | -0.02 | 0.11 | 0.98 (0.85 - 1.13) | 0.60 | 0.15 | 2  | NA              | NA   | NA | 0.31 (0 - 0.99) | 0.59 | 6  |     |
|                                    | Salmon R M Fk spr   | NA   | -0.13 | 0.05 | 0.88 (0.72 - 1.07) | 0.83 | 0.58 | 12 | NA              | NA   | NA | 1 (0.03 - 1)    | 0.85 | 15 |     |
|                                    | Salmon R Upper spr  | NA   | -0.09 | 0.10 | 0.91 (0.79 - 1.05) | 0.86 | 0.43 | 9  | NA              | NA   | NA | 0.85 (0.05 - 1) | 0.87 | 14 |     |
|                                    | Salmon R Upper sum  | NA   | -0.08 | 0.19 | 0.93 (0.76 - 1.13) | 0.75 | 0.39 | 7  | NA              | NA   | NA | 0.69 (0.01 - 1) | 0.79 | 15 |     |
|                                    | Secesh R sum        | NA   | -0.02 | 0.05 | 0.98 (0.90 - 1.08) | 0.59 | 0.06 | 2  | NA              | NA   | NA | 0.16(0 - 0.95)  | 0.47 | 3  |     |
|                                    | Sulphur Cr spr      | 200  | -0.08 | 0.30 | 0.92 (0.73 - 1.18) | 0.72 | 0.41 | 8  | 0.50 (0 - 1)    | 0.63 | 26 | 0.66 (0.01 - 1) | 0.79 | 18 |     |
|                                    | Valley Cr Upper spr | NA   | -0.10 | 0.40 | 0.90 (0.69 - 1.19) | 0.75 | 0.48 | 10 | NA              | NA   | NA | 0.73 (0.01 - 1) | 0.82 | 23 |     |
|                                    | Valley Cr Upper sum | NA   | -0.11 | 0.18 | 0.90 (0.74 - 1.09) | 0.83 | 0.50 | 10 | NA              | NA   | NA | 0.84 (0.06 - 1) | 0.86 | 18 |     |
|                                    | Wallowa Cr spr      | NA   | -0.11 | 0.42 | 0.89 (0.68 - 1.18) | 0.78 | 0.52 | 11 | NA              | NA   | NA | 0.77 (0.03 - 1) | 0.84 | 25 |     |
|                                    | Wenaha R S Fk spr   | NA   | -0.05 | 0.12 | 0.95 (0.83 - 1.10) | 0.70 | 0.23 | 5  | NA              | NA   | NA | 0.50 (0 - 1)    | 0.71 | 9  |     |
|                                    | Yankee Fk sum       | NA   | -0.18 | 0.39 | 0.83 (0.63 - 1.11) | 0.88 | 0.70 | 17 | NA              | NA   | NA | 0.94 (0.15 - 1) | 0.92 | 33 |     |
|                                    | Yankee W Fk sum     | NA   | -0.10 | 0.15 | 0.90 (0.76 - 1.08) | 0.84 | 0.49 | 10 | NA              | NA   | NA | 0.86 (0.04 - 1) | 0.87 | 16 |     |
|                                    | Yankee W Fk spr     | NA   | -0.19 | 0.10 | 0.83 (0.71 - 0.96) | 0.97 | 0.84 | 17 | NA              | NA   | NA | 1 (0.71 - 1)    | 0.98 | 25 |     |
| <b>Snake R fall chinook</b>        | Snake R             | 1946 | -0.11 | 0.09 | 0.89 (0.77 - 1.03) | 0.90 | 0.55 | 11 | 0.24 (0 - 0.98) | 0.50 | 4  | 0.94 (0.08 - 1) | 0.91 | 15 | a   |
| <b>Lower Columbia R steelhead</b>  | Clackamas R win     | 1041 | -0.04 | 0.06 | 0.96 (0.86 - 1.07) | 0.72 | 0.14 | 4  | 0 (0 - 0.36)    | 0.15 | 0  | 0.43 (0 - 1)    | 0.66 | 6  | a   |
| <b>Middle Columbia R steelhead</b> | Bear Cr sum         | NA   | -0.08 | 0.09 | 0.93 (0.81 - 1.06) | 0.82 | 0.35 | 7  | NA              | NA   | NA | 0.76 (0.02 - 1) | 0.82 | 11 | t,a |
|                                    | Fields Cr sum       | NA   | -0.08 | 0.26 | 0.92 (0.74 - 1.14) | 0.76 | 0.42 | 8  | NA              | NA   | NA | 0.70 (0.01 - 1) | 0.81 | 17 |     |
|                                    | Kahler Cr sum       | NA   | -0.03 | 0.27 | 0.97 (0.78 - 1.21) | 0.58 | 0.26 | 3  | NA              | NA   | NA | 0.41 (0 - 0.99) | 0.65 | 11 | a   |
|                                    | Murderers Cr sum    | NA   | -0.11 | 0.16 | 0.90 (0.75 - 1.07) | 0.86 | 0.51 | 10 | NA              | NA   | NA | 0.86 (0.06 - 1) | 0.88 | 17 | t   |
|                                    | Parrish Cr sum      | NA   | -0.04 | 0.27 | 0.96 (0.77 - 1.21) | 0.61 | 0.28 | 4  | NA              | NA   | NA | 0.45 (0 - 1)    | 0.67 | 12 |     |

|                                                      |                      |    |       |      |                    |      |      |    |    |    |    |                 |      |    |   |
|------------------------------------------------------|----------------------|----|-------|------|--------------------|------|------|----|----|----|----|-----------------|------|----|---|
| <b>Snake R<br/>steelhead</b>                         | Riley Cr sum         | NA | -0.06 | 0.31 | 0.94 (0.74 - 1.21) | 0.66 | 0.35 | 6  | NA | NA | NA | 0.56 (0 - 1)    | 0.73 | 16 |   |
|                                                      | Tex Cr sum           | NA | -0.10 | 0.19 | 0.90 (0.75 - 1.09) | 0.83 | 0.49 | 10 | NA | NA | NA | 0.82 (0.04 - 1) | 0.86 | 18 |   |
|                                                      | Vance Cr sum         | NA | -0.04 | 0.06 | 0.96 (0.81 - 1.13) | 0.65 | 0.26 | 4  | NA | NA | NA | 0.46 (0 - 1)    | 0.64 | 6  |   |
|                                                      | Camp Cr sum A run    | NA | -0.03 | 0.25 | 0.97 (0.78 - 1.20) | 0.59 | 0.25 | 3  | NA | NA | NA | 0.40 (0 - 1)    | 0.65 | 11 | a |
|                                                      | Crow Cr sum A        | NA | -0.04 | 0.27 | 0.96 (0.77 - 1.19) | 0.63 | 0.30 | 4  | NA | NA | NA | 0.49 (0 - 1)    | 0.70 | 13 | a |
|                                                      | Devils Run Cr sum A  | NA | -0.02 | 0.25 | 0.98 (0.80 - 1.22) | 0.54 | 0.22 | 2  | NA | NA | NA | 0.34 (0 - 0.99) | 0.61 | 9  | a |
|                                                      | Five Points Cr sum A | NA | -0.01 | 0.08 | 0.99 (0.88 - 1.11) | 0.53 | 0.09 | 1  | NA | NA | NA | 0.18 (0 - 0.94) | 0.48 | 3  |   |
|                                                      | Fly Cr sum A         | NA | -0.04 | 0.21 | 0.96 (0.79 - 1.16) | 0.65 | 0.27 | 4  | NA | NA | NA | 0.48 (0 - 1)    | 0.69 | 11 | a |
|                                                      | Mccoy Cr sum A       | NA | -0.04 | 0.25 | 0.96 (0.77 - 1.19) | 0.63 | 0.29 | 4  | NA | NA | NA | 0.48 (0 - 1)    | 0.70 | 13 |   |
|                                                      | Prairie Cr sum A     | NA | 0.01  | 0.33 | 1.01 (0.79 - 1.29) | 0.44 | 0.18 | 0  | NA | NA | NA | 0.23 (0 - 0.97) | 0.53 | 8  | a |
|                                                      | Spring Cr sum A      | NA | 0.04  | 0.04 | 1.04 (0.90 - 1.20) | 0.31 | 0.10 | 0  | NA | NA | NA | 0 (0 - 0.83)    | 0.30 | 0  |   |
|                                                      | Swamp Cr sum A       | NA | -0.03 | 0.15 | 0.97 (0.82 - 1.14) | 0.63 | 0.21 | 3  | NA | NA | NA | 0.41 (0 - 1)    | 0.65 | 9  |   |
|                                                      | Wallowa R sum A      | NA | -0.08 | 0.08 | 0.92 (0.80 - 1.06) | 0.83 | 0.37 | 8  | NA | NA | NA | 0.80 (0.02 - 1) | 0.83 | 11 |   |
| <b>Upper<br/>Columbia R<br/>sum/fall<br/>chinook</b> | Hanford Reach fall   | NA | 0.02  | 0.10 | 1.02 (0.88 - 1.18) | 0.39 | 0.08 | 0  | NA | NA | NA | 0.08 (0 - 0.90) | 0.39 | 2  | a |
|                                                      | Methow R sum         | NA | -0.05 | 0.06 | 0.95 (0.85 - 1.07) | 0.75 | 0.19 | 5  | NA | NA | NA | 0.52 (0 - 1)    | 0.70 | 7  | a |
|                                                      | Okanogan R sum       | NA | 0.00  | 0.11 | 1.00 (0.86 - 1.18) | 0.45 | 0.12 | 0  | NA | NA | NA | 0.15 (0 - 0.97) | 0.46 | 3  | a |
|                                                      | Similkameen R sum    | NA | 0.04  | 0.08 | 1.04 (0.91 - 1.19) | 0.27 | 0.05 | 0  | NA | NA | NA | 0.02 (0 - 0.73) | 0.27 | 0  | a |
|                                                      | Wenatchee R sum      | NA | 0.01  | 0.02 | 1.01 (0.93 - 1.08) | 0.39 | 0.02 | 0  | NA | NA | NA | 0.01 (0 - 0.69) | 0.24 | 0  | a |
| <b>Middle<br/>Columbia R<br/>spring chinook</b>      | Bull Run Cr spr      | NA | -0.01 | 0.09 | 0.99 (0.87 - 1.13) | 0.52 | 0.10 | 1  | NA | NA | NA | 0.19 (0 - 0.96) | 0.49 | 4  |   |
|                                                      | Clear Cr spr         | NA | -0.05 | 0.06 | 0.95 (0.89 - 1.06) | 0.78 | 0.17 | 5  | NA | NA | NA | 0.53 (0 - 1)    | 0.72 | 7  |   |
|                                                      | Granite Cr spr       | NA | -0.02 | 0.03 | 0.98 (0.91 - 1.05) | 0.68 | 0.05 | 2  | NA | NA | NA | 0.19 (0 - 0.95) | 0.49 | 2  |   |
|                                                      | John Day R spr       | NA | 0.02  | 0.04 | 1.02 (0.94 - 1.12) | 0.26 | 0.02 | 0  | NA | NA | NA | 0.01 (0 - 0.44) | 0.18 | 0  |   |

|                     |    |      |      |                    |      |      |   |    |    |    |                 |      |   |
|---------------------|----|------|------|--------------------|------|------|---|----|----|----|-----------------|------|---|
| John Day R M Fk spr | NA | 0.05 | 0.08 | 1.05 (0.93 - 1.18) | 0.20 | 0.03 | 0 | NA | NA | NA | 0.01 (0 - 0.50) | 0.19 | 0 |
| John Day R N Fk spr | NA | 0.01 | 0.06 | 1.01 (0.92 - 1.12) | 0.36 | 0.04 | 0 | NA | NA | NA | 0.04 (0 - 0.73) | 0.29 | 0 |

<sup>1</sup> VHER = Very High Extinction Risk = Probability that extinction risk in 50 years is over 25%

<sup>2</sup> VHRD = Very High Risk of Decline = Probability that risk of 90% decline in 50 years is over 25%

<sup>3</sup> Tests for underlying assumptions were made on the running sums of wild spawner only counts where possible; otherwise total mixed counts were used. The codes designate tests that failed at (p<.05). Note that a number of the "fails" are false-fails since the p-value was not adjusted for multiple tests being conducted. If p value is adjusted (p<.001) to reduce the probability of a false positive to less than 5%, none of the time series fail the diagnostic tests.

- a. Significant 1st order autocorrelation in  $\ln(R_{t+1}/R_t)$  found.
- t. A model with a trend in  $\mu$  fit the data significantly better than the model with no trend. This indicates that the risk estimates are optimistic.
- l. The variance versus  $\tau$  plot showed significant non-linearity ( $R^2 < 0.7$ ) indicating an underestimate of  $\sigma^2$ .
- d. A model with compensatory density-dependence fit the data significantly better than model with no density-dependence  
This indicates that the risk estimates are pessimistic.
